# Supplementary material
Source: PubMed Central journal article supplement (PMC2234206)

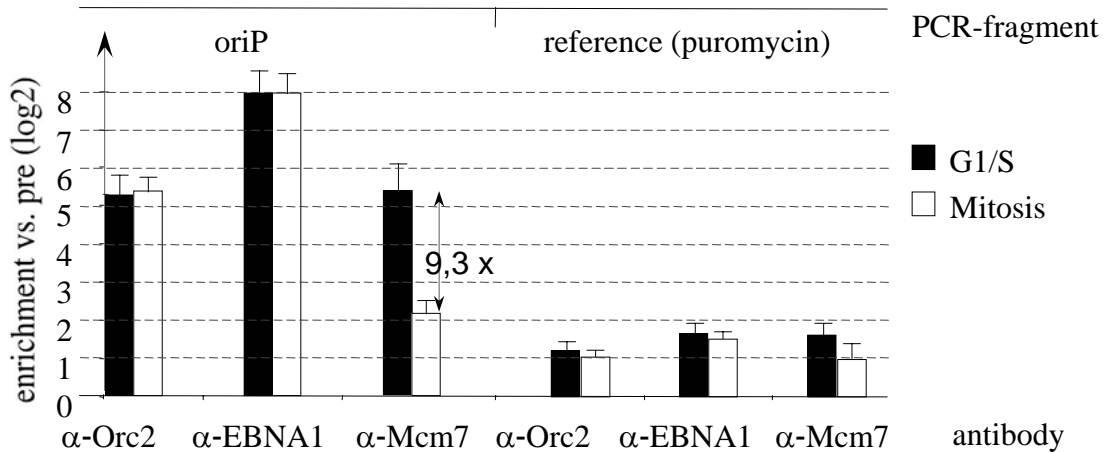

Supplement: pnas_0707260105_1.pdf [file pnas_0707260105_1.pdf]

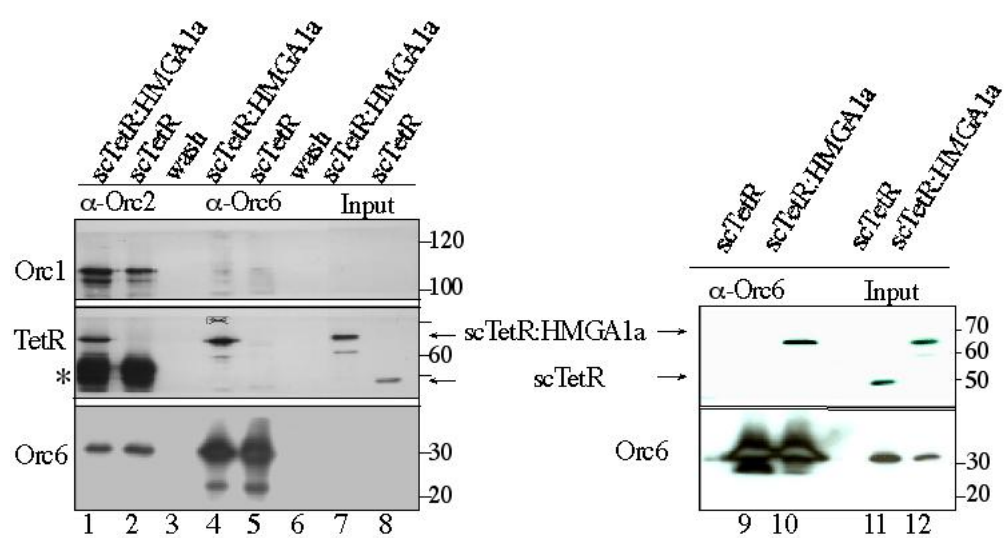

Supplement: pnas_0707260105_2.pdf [file pnas_0707260105_2.pdf]

live cells

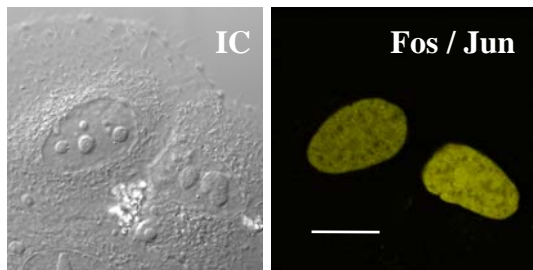

Immunofluorescence

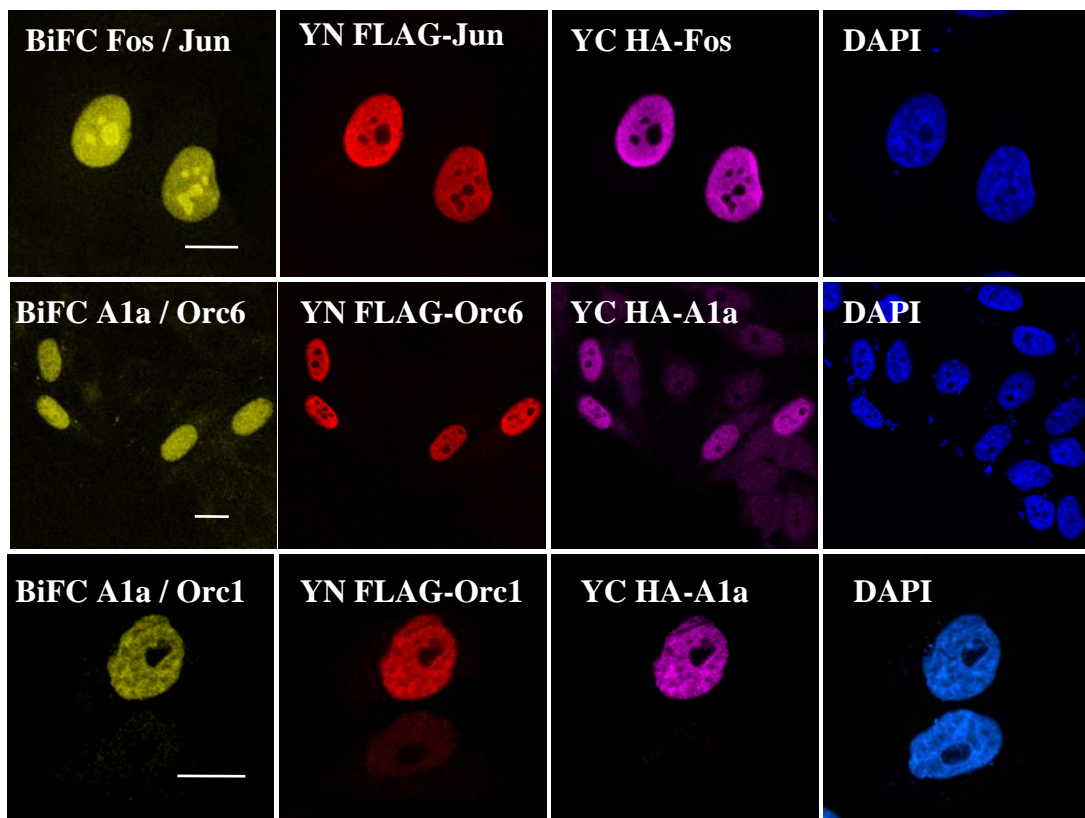

Supplement: pnas_0707260105_3.pdf [file pnas_0707260105_3.pdf]

A

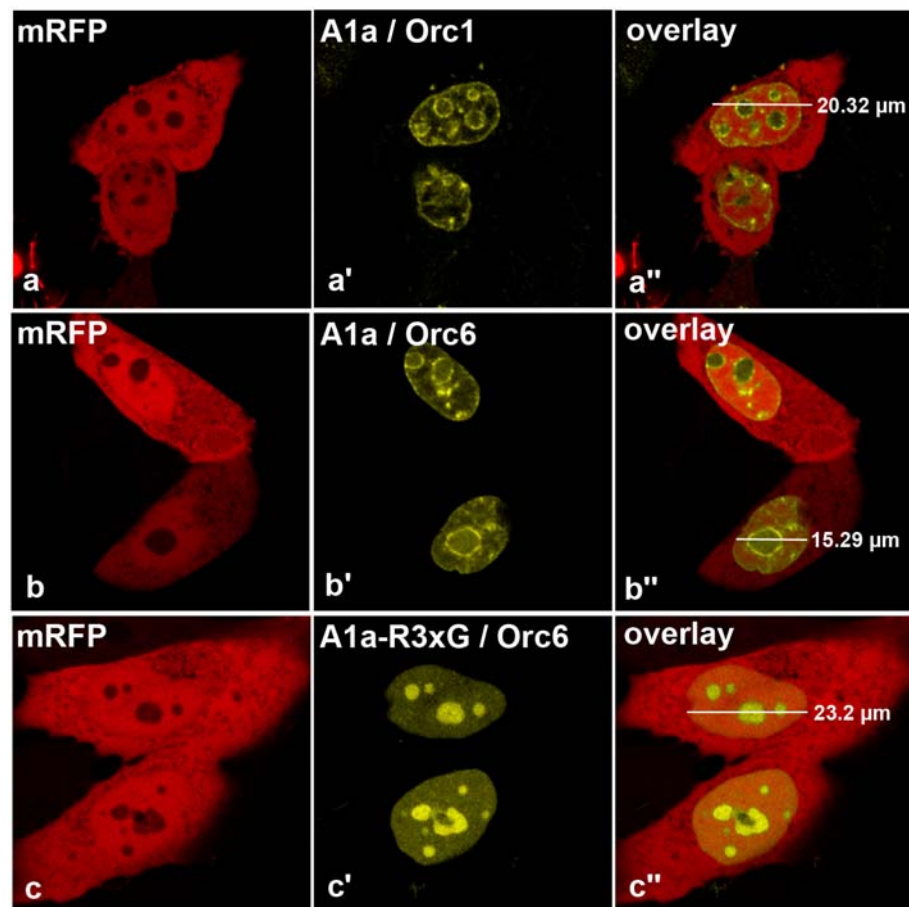

relative intensity profiles

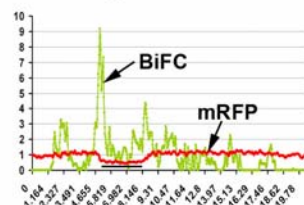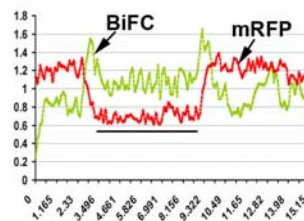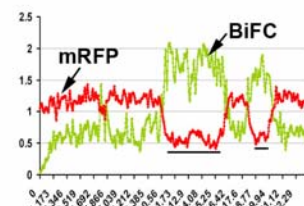Distance in  $\mu\text{m}$ 

B

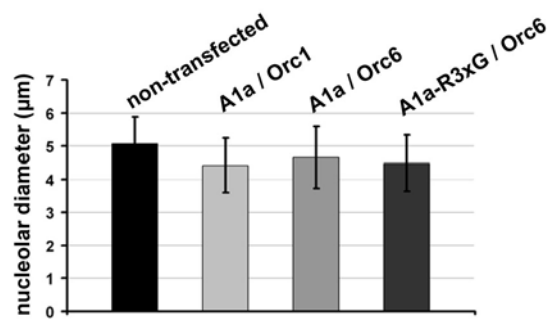

Supplement: pnas_0707260105_4.pdf [file pnas_0707260105_4.pdf]

**A**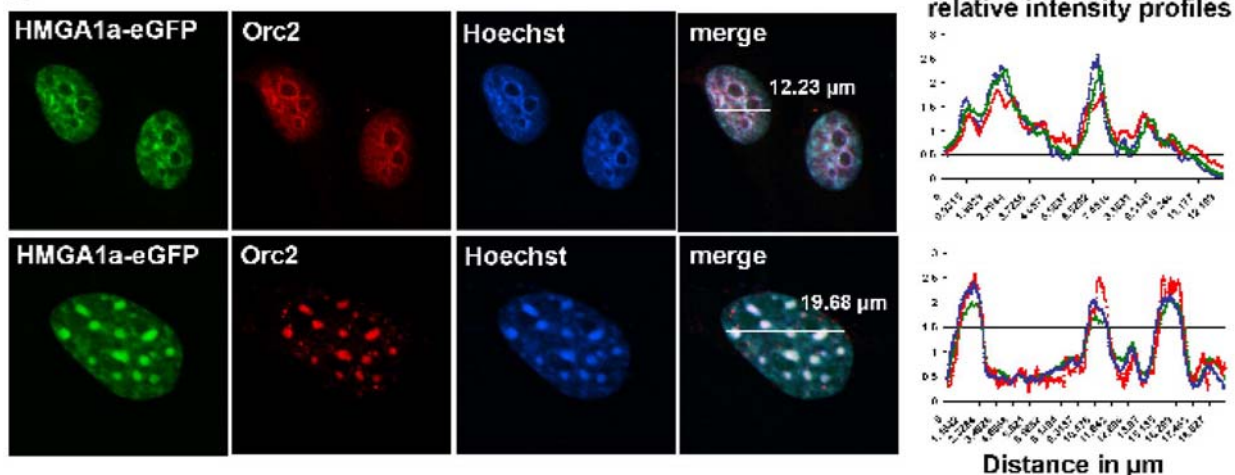**B**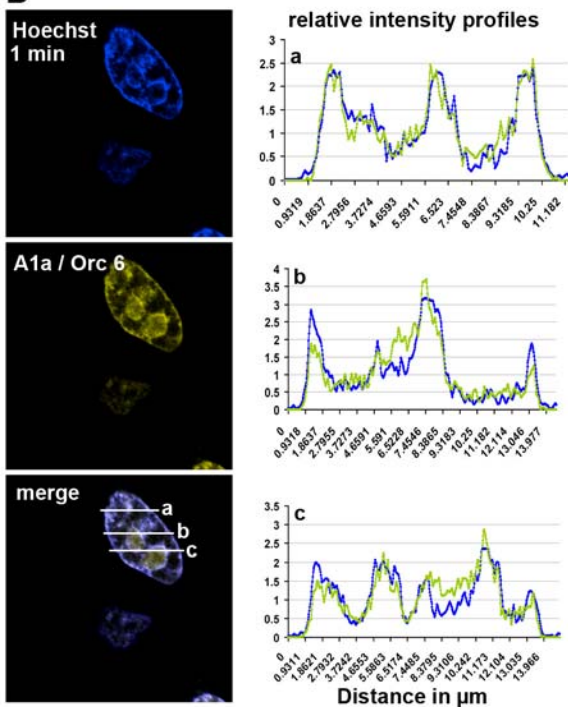**C**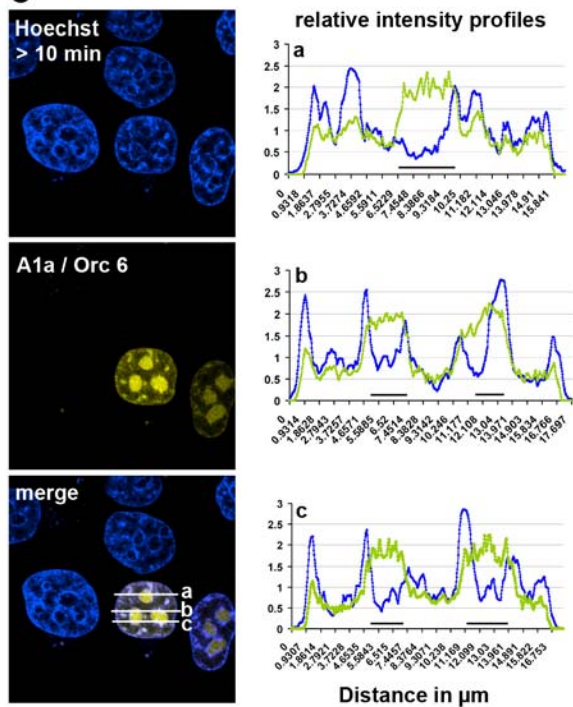**D**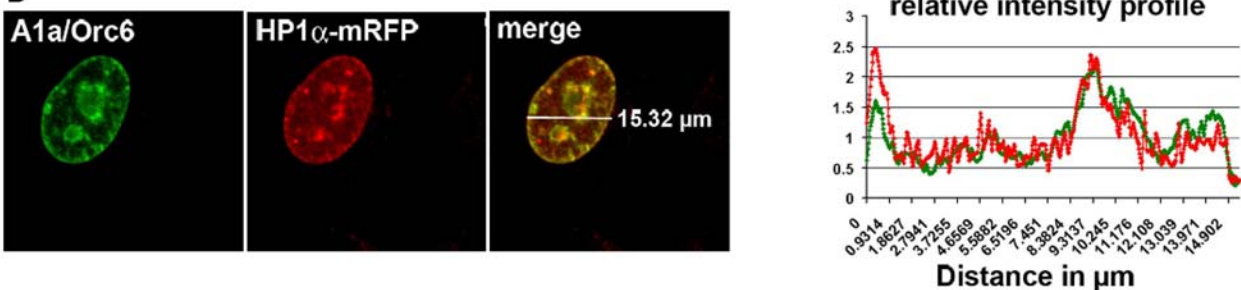

Supplement: pnas_0707260105_5.pdf [file pnas_0707260105_5.pdf]

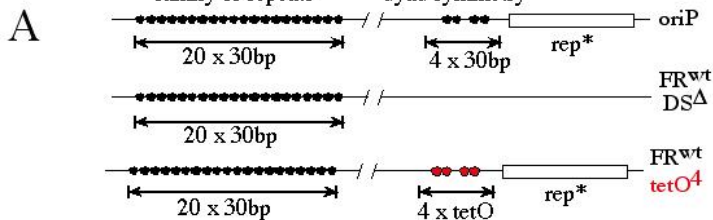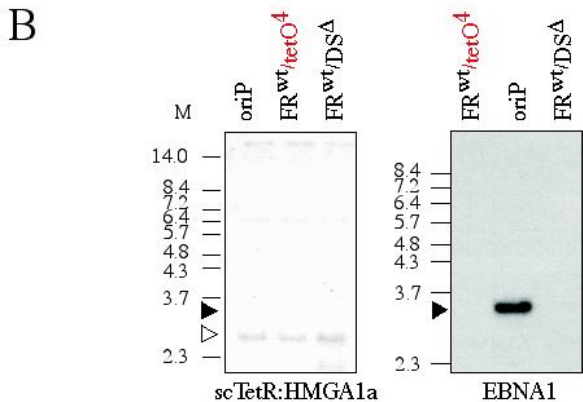

Supplement: pnas_0707260105_6.pdf [file pnas_0707260105_6.pdf]
